# Supplementary material
Source: MDPI journal article supplement (https://www.mdpi.com/2071-1050/12/10/4157)
Supplement: s1 [file s1]

## Research Instrument—Questionnaire

Addressed to: Chinese tourist consumers

Timing: After having completed their visit to a tourist attraction

**Research project:** “The influence of smart technologies on visit experience in tourist attractions within the smart tourism management framework”

**Purpose:** The main aim of this project is to explore how the smart technologies influence the visit experience in tourist attractions in terms of ‘customer journey’. It analyses how the smart tourism technologies (STTs) are used by tourist attractions and how these technologies are influencing the visit experience.

### 1. PERCEPTION ABOUT AND USES OF SMART TECHNOLOGIES DURING THE VISIT LIFE CYCLE

The respondent is asked to consider the following items and express his/her opinion, level of agreement on these (*Please select your answer with an ‘X’*).

**1.1 Concept of smart tourist:** The experts describe the concept of ‘Smart tourist’ as follows. *“is the tourist who, by being open to sharing his/her data and making use of smart technologies, interacts dynamically with other stakeholders, co-creating in this way an enhanced and personalised smart experience. This tourist is open to innovations, social and pro-active and finds his/her natural environment in the smart tourism ecosystem and the smart destination and attraction”*.

| Strongly disagree | Disagree | Neutral | Neither agree nor disagree | Agree | Strongly agree |
|-------------------|----------|---------|----------------------------|-------|----------------|
|-------------------|----------|---------|----------------------------|-------|----------------|

**1.2.** Smart technologies and digital platforms have been adopted and used by tourists for various purposes at the 3 stages of the visit experience cycle. **How important is to you to use smart technologies** in terms of stage of visit (before, during and after) to a tourist attraction? (*Please select your answer with an ‘X’ per item*)

| Phase/stage                        | Not all important | Slightly important | Important | Fairly important | Very important |
|------------------------------------|-------------------|--------------------|-----------|------------------|----------------|
| Before the visit                   |                   |                    |           |                  |                |
| During the visit (On-site)         |                   |                    |           |                  |                |
| Post visit (after the visit)       |                   |                    |           |                  |                |
| All phases of the visit experience |                   |                    |           |                  |                |

**1.3 Utility of smart technologies in performing tourism and travel activities.** Please rate how important/helpful are smart technologies to you in performing the following activities: (*Please select your answer with an ‘X’ for each item*)

| Activities            | Not all useful | Slightly useful | Useful | Fairly useful | Very useful |
|-----------------------|----------------|-----------------|--------|---------------|-------------|
| Searching information |                |                 |        |               |             |

|                                          |
|------------------------------------------|
| Planning trips/visit                     |
| Creating/forming expectations            |
| Making decisions                         |
| Buying (Shopping and booking)            |
| Preparing/Getting ready                  |
| Experiencing the attraction/ destination |
| Searching and enjoying                   |
| On-site buying                           |
| Remembering the experience               |
| Evaluating (sharing reviews and photos)  |

**1.4 Usage of smart technologies.** What smart technologies do you use in the three phases of your visit experience (before/prospective phase, during/active phase, and after reflective phase)? Please select the three most commonly used smart technologies

| Smart Technologies                                                                  |
|-------------------------------------------------------------------------------------|
| Mobile technology: Wearable devices (e.g. smartphones and tablets) and applications |
| Cloud computing (to gather and share data)                                          |
| Artificial Intelligence                                                             |
| Ubiquitous connection to networks (Wi-Fi)                                           |
| Virtual Reality                                                                     |
| Augmented Reality                                                                   |
| Social networks: platforms, messaging apps, microblog and virtual communities       |
| Chatbot (robot capable to interact)                                                 |

**1.5 Smart technologies render tourist attraction's services and experiences more interesting and attractive.** (Please select your answer with an 'x').

| Strongly disagree | Disagree | Neutral / Neither agree or disagree | Agree | Strongly agree |
|-------------------|----------|-------------------------------------|-------|----------------|
|-------------------|----------|-------------------------------------|-------|----------------|

**1.6 Resulting benefits for tourists/visitors.** All smart technologies play a critical role for experience co-creation because they: (Please select your answer with an 'X' for each item).

|                                                                                | Strongly disagree | Disagree | Neutral / Neither agree or disagree | Agree | Strongly agree |
|--------------------------------------------------------------------------------|-------------------|----------|-------------------------------------|-------|----------------|
| Create value for tourists                                                      |                   |          |                                     |       |                |
| Make a contribution to co-create customized products/ services and experiences |                   |          |                                     |       |                |
| Other benefit (Specify)....                                                    |                   |          |                                     |       |                |
| • ...                                                                          |                   |          |                                     |       |                |

## SECTION 2. INFLUENCE OF SMART TECHNOLOGIES ON VISIT EXPERIENCE AT TOURIST ATTRACTIONS

Smart technologies are a very good channel to connect and interact with the visitors and medium for rendering the visit attractive, rewarding and memorable. It is believed that smart technologies influence the visit experience to a tourist attraction all 3 phases of this visit experience cycle (before/prospective phase, during/active phase and post visit/reflective phase).

The respondent is asked to express his/her opinion about/level of agreement on the following items related to the influence on their visit (*Please select your answer with an 'x'*)

**2.1 General opinion:** What is your general opinion about the smart technologies; do have they a value and utility in making your experience better and higher quality? (*Please select your answer with an 'x'*)

| Strongly negative | Negative | Neutral | Positive | Strongly positive |
|-------------------|----------|---------|----------|-------------------|
|                   |          |         |          |                   |

**2.2 Positive influence of STs on the PROSPECTIVE PHASE of the visit experience** (*Please select your answer with an 'X' for each item*)

|                           | Not all influence | Slight influence | Influence | Fair influence | Strong Influence |
|---------------------------|-------------------|------------------|-----------|----------------|------------------|
| Searching and planning    |                   |                  |           |                |                  |
| Reducing decision risk    |                   |                  |           |                |                  |
| Increasing interest in    |                   |                  |           |                |                  |
| Building an understanding |                   |                  |           |                |                  |

**2.3 Positive influence of STs on the ACTIVE PHASE of the visit (on-site)** (*Please select your answer with an 'X' for each item*)

|                                                             | Not all influence | Slight influence | Influence | Fair influence | Strong Influence |
|-------------------------------------------------------------|-------------------|------------------|-----------|----------------|------------------|
| Facilitating navigation and communication                   |                   |                  |           |                |                  |
| Enhancing convenience and speed                             |                   |                  |           |                |                  |
| Enhancing experience, flexibility, engagement and enjoyment |                   |                  |           |                |                  |
| Making short-term decisions                                 |                   |                  |           |                |                  |
| Recording and storing/collecting memories                   |                   |                  |           |                |                  |

**2.4 Positive influence of STs on the REFLECTIVE PHASE of the visit (post-visit)** (*Please select your answer with an 'X' for each item*)

|                                                  | Not all influence | Slight influence | Influence | Fair influence | Strong Influence |
|--------------------------------------------------|-------------------|------------------|-----------|----------------|------------------|
| Recollecting memories                            |                   |                  |           |                |                  |
| Sharing experiences (posting photos and reviews) |                   |                  |           |                |                  |

---

Evaluating (making  
recommendations and  
suggestions)

---

**2.5 Comments:** Do you wish to add any further comments? Please feel free to do so.

---

---

---

---

---

---

---

---

---

### SECTION 3. PROFILE: PERSONAL INFORMATION

#### 3.1 Gender:

|        |  |
|--------|--|
| Male   |  |
| Female |  |

#### 3.2 Age group (years):

|          |  |
|----------|--|
| 18 to 25 |  |
| 26 to 30 |  |
| 31 to 35 |  |
| 36 to 45 |  |
| 46 to 55 |  |
| 56 to 65 |  |
| 65+      |  |

#### 3.3 Educational level

|                     |  |
|---------------------|--|
| High school         |  |
| University degree   |  |
| Postgraduate degree |  |
| Other               |  |
|                     |  |

#### 3.4 Occupation: What is your work/professional capacity?

|                       |  |
|-----------------------|--|
| Student               |  |
| Admin/Office employee |  |
| Services              |  |
| Technician/Artisan    |  |
| Civil servant         |  |
| Professional          |  |
| Businessman           |  |
| Other (specify)....   |  |

#### 3.5 Visits to tourist attractions: Number of visits

| Number of visits | The specific tourist attraction | Other smart tourist attractions |
|------------------|---------------------------------|---------------------------------|
| 1 to 3           |                                 |                                 |
| 4 to 6           |                                 |                                 |
| 7 to 10          |                                 |                                 |

We would like to thank you for your time and cooperation!

The Research Team  
Department of Tourism Management  
NINGBO UNIVERSITY
